# Supplementary material for: A Diverse Range of Novel RNA Viruses in Geographically Distinct Honey Bee Populations
Source: PubMed Central journal article supplement (PMC5533899; doi:10.1128/jvi.00158-17), 2017-07-27

## **SUPPLEMENTAL MATERIAL**

**Figure S1. Rhabdo-like viruses.** Maximum likelihood phylogenetic tree of RdRp protein alignment of Rhabdoviruses. New *Apis mellifera* Rhabdoviruses 1 and 2 are indicated by red dots.

**Figure S2. Bunya-like viruses.** Maximum likelihood phylogenetic tree of RdRp protein alignment of Bunyaviruses. New *Apis mellifera* Bunyaviruses 1 and 2 are indicated by red dots.

**Figure S3. Flavi-like viruses.** Maximum likelihood phylogenetic tree of RdRp protein alignment of Flaviviruses. New *Apis mellifera* Flavivirus 1 is indicated by a red dot.

Figure S1

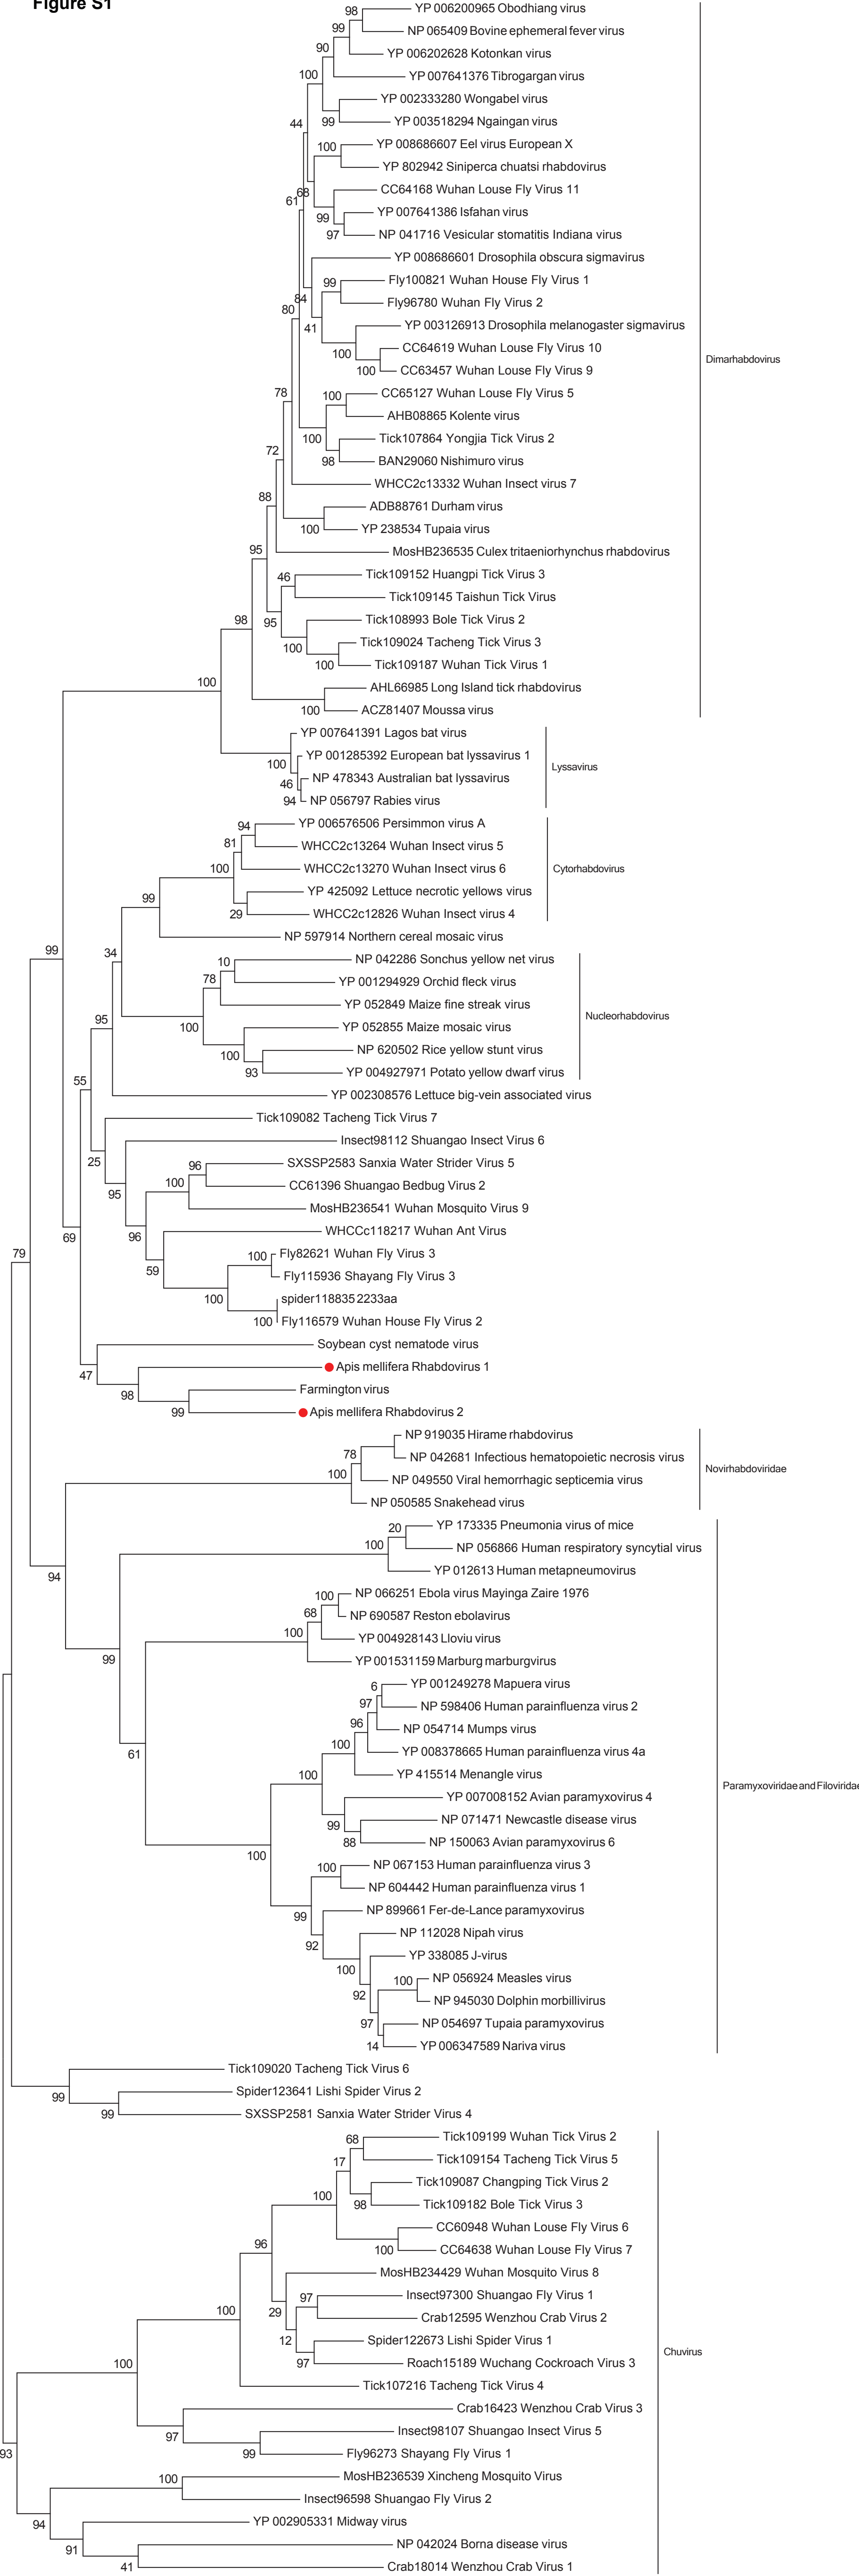

0.5

Figure S2

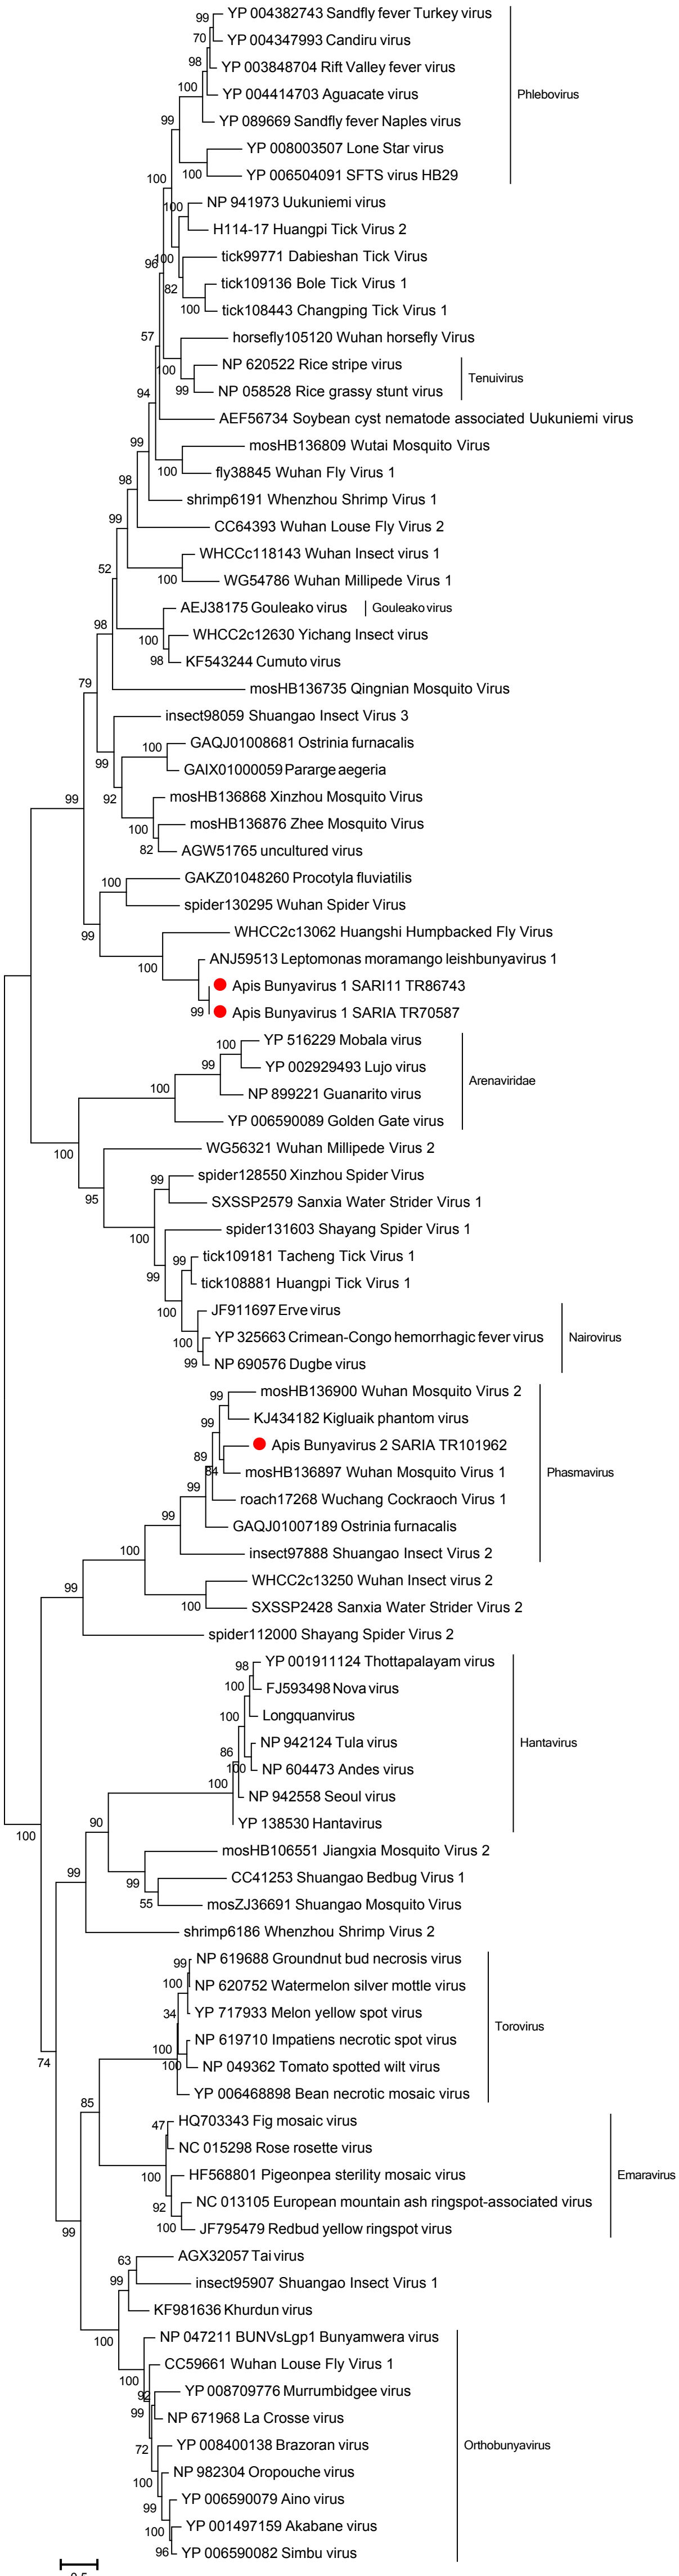

Figure S3

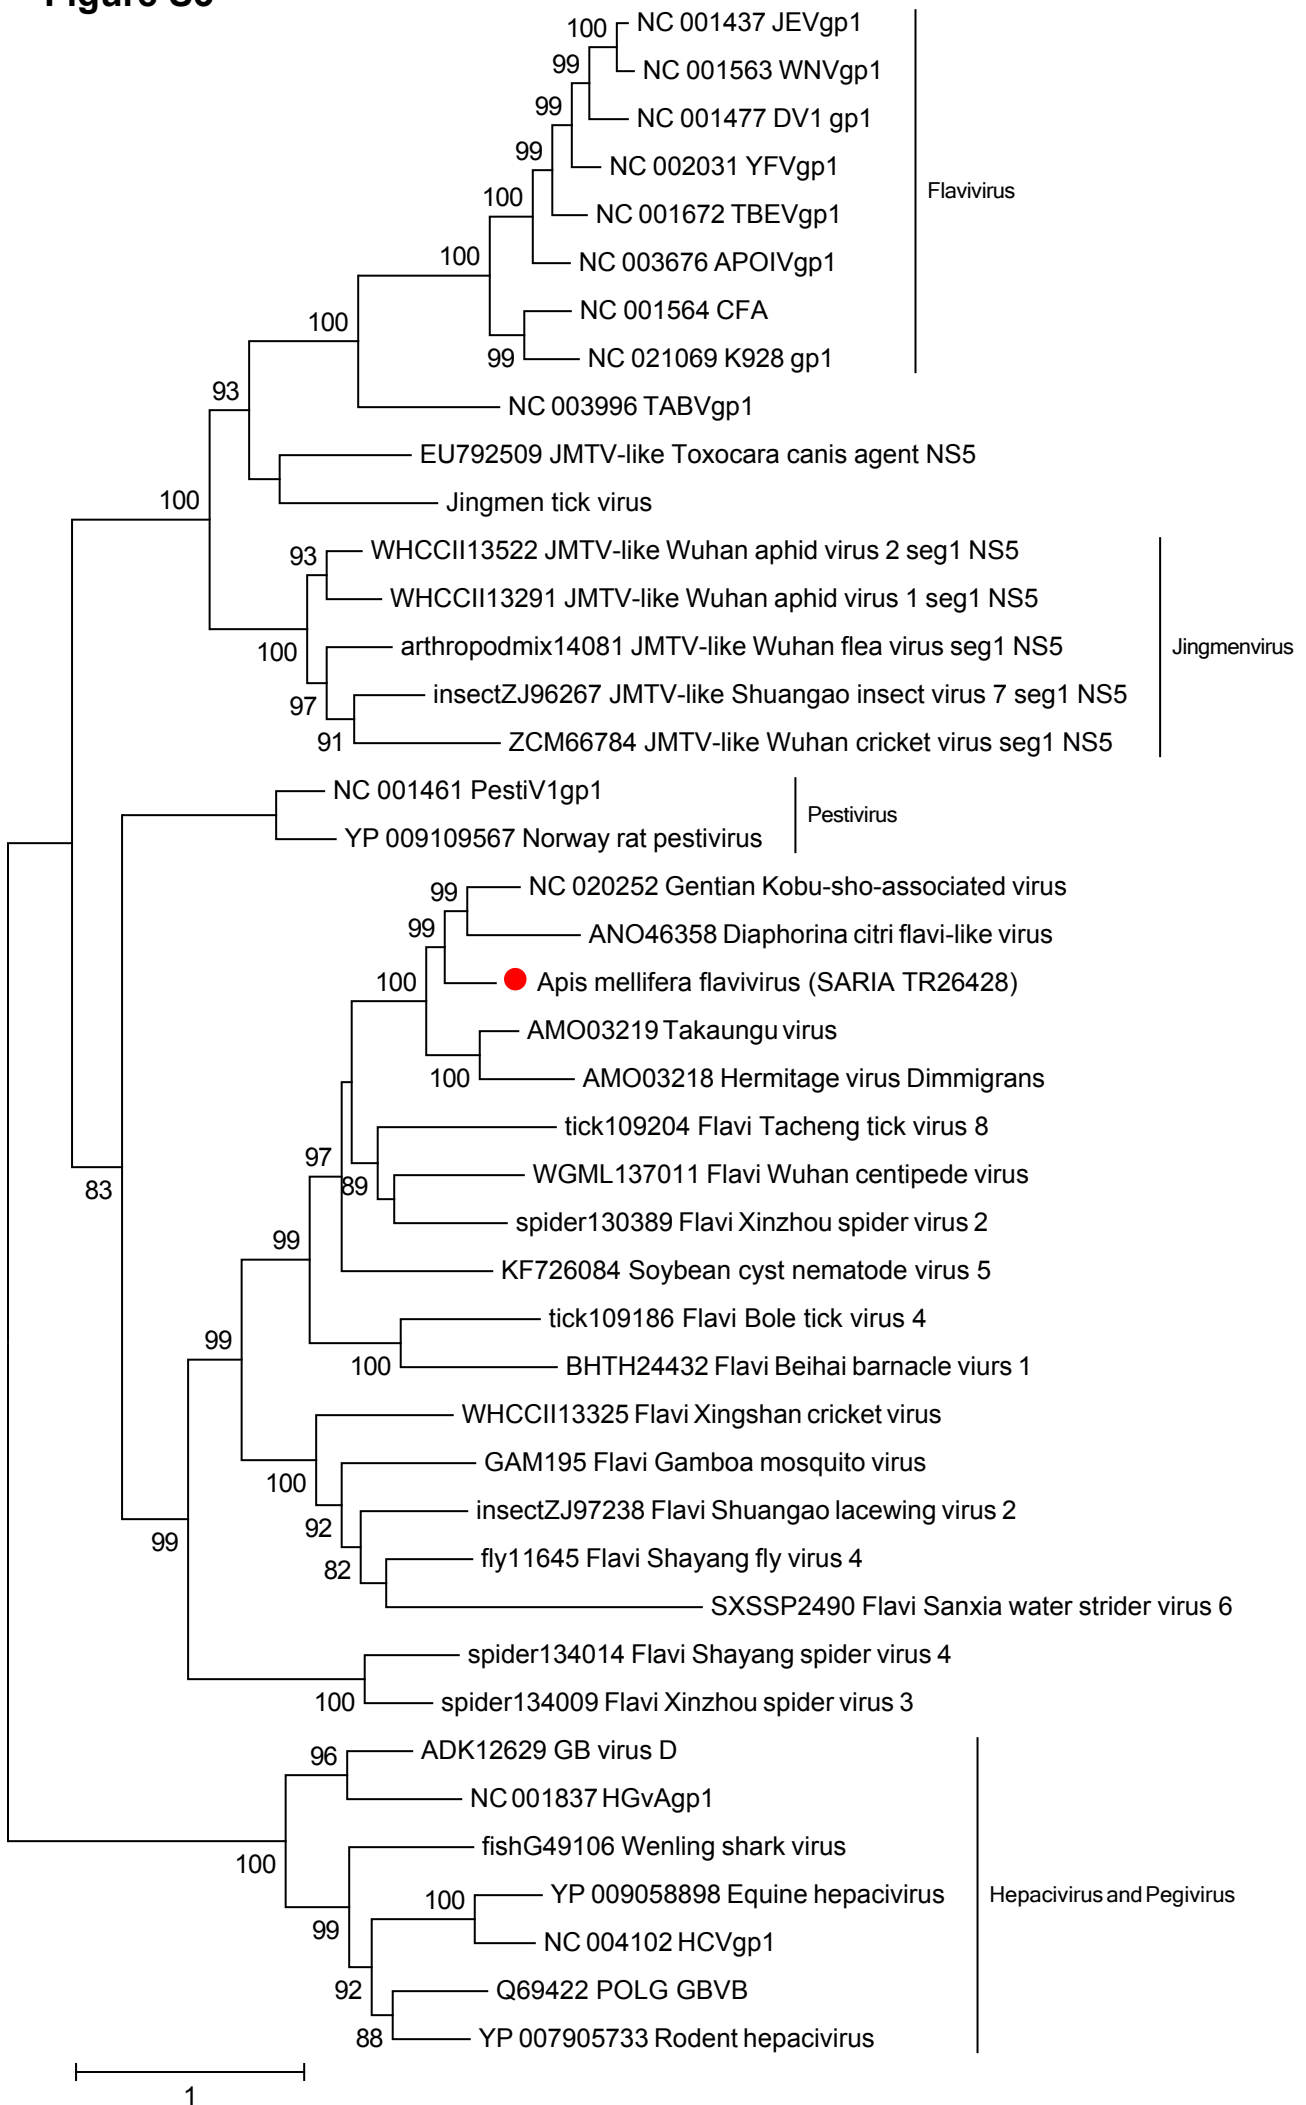

Supplement: JVI.00158-17_zjv999182764s1.pdf [file JVI.00158-17_zjv999182764s1.pdf]
